# Supplementary material for: Modeling FOG Drift Using Back-Propagation Neural Network Optimized by Artificial Fish Swarm Algorithm
Source: Hindawi journal article supplement (doi:10.1155/2014/273043), 2014-01-01
Supplement: f1 [file 273043.f1.zip]

Archive with 4 entries (2 files):
- mat.273043.v1/
- mat.273043.v1/datasets/
- mat.273043.v1/datasets/drift.xls
- mat.273043.v1/datasets/temperature.xls
