# Supplementary material for: Modeling FOG Drift Using Back-Propagation Neural Network Optimized by Artificial Fish Swarm Algorithm
Source: Hindawi journal article supplement (doi:10.1155/2014/273043), 2014-01-01
Supplement: f1 [file 273043.f1.zip › mat.273043.v1/datasets/drift.xls]

## Sheet: Sheet1
0.068254
0.0614849
0.0596138
0.0472647
0.0407719
0.0207776
0.013419
-0.00207695
-0.00215464
-0.0291587
-0.0144407
-0.0283601
-0.038053
-0.0349477
-0.0317159
-0.0259038
-0.0248336
-0.0334335
-0.0253132
-0.00902473
0.0190637
0.0319019
0.0457679
0.0539591
0.0643963
0.0951538
0.109782
0.120555
0.14683
0.176153
0.192517
0.197292
0.208331
0.222026
0.231493
0.238462
0.241392
0.240638
0.236563
0.2342
0.230973
0.216636
0.218914
0.223287
0.223826
0.220199
0.212362
0.195034
0.180912
0.170553
0.153026
0.132996
0.126156
0.106402
0.0887418
0.0623752
0.0486347
0.0462899
0.0436171
0.0410025
0.0270973
0.0184997
0.0134151
0.00877684
0.00479096
-0.00066897
-0.00184072
-0.00695506
-0.00879409
-0.00436019
0.00624091
0.0252657
0.0281316
0.0286284
0.0380081
0.0589568
0.0790985
0.0887657
0.0829756
0.0602288
0.0563812
0.0657347
0.0678457
0.0733191
0.0657366
0.0625416
0.0661485
0.0731224
0.0782824
0.0805323
0.0787734
0.0803554
0.0661119
0.0563823
0.0502881
0.0534042
0.0484673
0.0454199
0.0345154
0.0179915
0.0264209
0.0383282
0.0409915
0.0459427
0.0452106
0.0417905
0.0356897
0.0297656
0.02355
0.0258728
0.0405487
0.0573874
0.0695036
0.0724535
0.0700744
0.0735993
0.0663967
0.0591237
0.0610078
0.0614818
0.0681464
0.067373
0.0689644
0.0718729
0.0706267
0.0682589
0.0627499
0.061237
0.0601057
0.0644781
0.0600632
0.0481036
0.0648523
0.0781386
0.0818873
0.0855749
0.079725
0.0779593
0.0765244
0.0746843
0.0647402
0.0561852
0.0674042
0.0657789
0.0622849
0.0536203
0.0490259
0.0479714
0.0404661
0.0397273
0.0294149
0.0188874
0.0213198
0.0169241
0.00296704
-0.00213071
0.00947723
0.0105695
0.00457463
-0.00423799
-0.0155038
-0.0146598
-0.00156595
0.0141579
0.0199443
0.0203643
0.0221987
0.0180765
0.0119466
0.00890464
-0.00050238
-0.0145474
-0.0295239
-0.0446794
-0.0444254
-0.00892768
-0.00903843
-0.026067
-0.048298
-0.042207
-0.0442962
-0.051057
-0.0508772
-0.0591837
-0.0739451
-0.0916226
-0.0962355
-0.0864311
-0.0902936
-0.0858305
-0.0985254
-0.110634
-0.10693
-0.0907481
-0.0949877
-0.08698
-0.0974802
-0.0969599
-0.101494
-0.0763566
-0.0870591
-0.0877344
-0.0880054
-0.103193
-0.116361
-0.111941
-0.100872
-0.0837709
-0.074852
-0.0694426
-0.0637988
-0.0565245
-0.0543883
-0.0608593
-0.0529922
-0.0462058
-0.0571459
-0.0643276
-0.0488222
-0.0173275
-0.0117826
-0.0299014
-0.0333546
-0.0395739
-0.0390711
-0.0504982
-0.0547613
-0.0683882
-0.0668254
-0.0626761
-0.056408
-0.0460161
-0.0423054
-0.0460481
-0.0665358
-0.0949048
-0.101936
-0.0924533
-0.0782222
-0.0768797
-0.100714
-0.134252
-0.136367
-0.123472
-0.13065
-0.151948
-0.164415
-0.176939
-0.192869
-0.204782
-0.204326
-0.203248
-0.19142
-0.190786
-0.195524
-0.199946
-0.205546
-0.220673
-0.237133
-0.251606
-0.261029
-0.274045
-0.265913
-0.262691
-0.263171
-0.27084
-0.259058
-0.251301
-0.249055
-0.258899
-0.259973
-0.258797
-0.243867
-0.239242
-0.235014
-0.222513
-0.206721
-0.192145
-0.177455
-0.161837
-0.148852
-0.144396
-0.127494
-0.108307
-0.0971025
-0.0927217
-0.0674759
-0.0570923
-0.0608038
-0.0706743
-0.0451369
-0.0198856
-0.0108576
-0.0166044
-0.020184
-0.0197417
-0.0202633
-0.0213625
-0.0181908
-0.00322591
0.00580394
0.000340836
-0.0082037
-0.0121118
-0.00238086
0.00675446
0.00189197
-0.0274562
-0.0503901
-0.0590563
-0.0543691
-0.0664706
-0.0674632
-0.0676074
-0.0640595
-0.0639626
-0.0571793
-0.0557007
-0.0731036
-0.0971546
-0.111947
-0.123098
-0.122201
-0.104352
-0.100235
-0.0904307
-0.0729485
-0.0633806
-0.0570431
-0.0390592
-0.0428159
-0.0603253
-0.0603257
-0.0532232
-0.0458458
-0.0333497
-0.0149832
0.00297758
0.025516
0.0465852
0.066508
0.0736597
0.0641148
0.0512171
0.0490752
0.0604731
0.0876802
0.11559
0.120427
0.120738
0.130851
0.139687
0.140798
0.133477
0.126397
0.121949
0.114778
0.111127
0.107988
0.13328
0.143292
0.155689
0.140353
0.131534
0.127067
0.117523
0.112065
0.101101
0.0958576
0.0888123
0.0953543
0.0947838
0.0752437
0.0651166
0.0578229
0.0575503
0.0382458
0.0231387
0.00449963
0.000670057
-0.000239551
0.00110345
-0.0104677
-0.0125978
-0.0247426
-0.0397385
-0.055166
-0.0619861
-0.0815806
-0.100232
-0.0881653
-0.0739537
-0.0731658
-0.0880359
-0.102155
-0.129929
-0.151477
-0.162282
-0.166047
-0.158261
-0.157343
-0.164787
-0.168588
-0.167623
-0.156469
-0.154504
-0.151784
-0.167733
-0.185532
-0.197565
-0.197493
-0.196586
-0.195804
-0.194974
-0.194017
-0.192512
-0.173158
-0.147908
-0.132042
-0.127098
-0.110035
-0.100184
-0.0874776
-0.0803916
-0.09153
-0.0963285
-0.0862408
-0.0679099
-0.0598338
-0.0460466
-0.037071
-0.0303007
-0.0130863
-0.00166115
0.00534312
0.00760775
0.0159158
0.0201634
0.0266815
0.0356908
0.0492295
0.0676858
0.0789687
0.0824532
0.0933809
0.0978882
0.0997087
0.0877964
0.0881965
0.0921466
0.0884664
0.0930915
0.0898765
0.0880297
0.0775753
0.0648491
0.0630776
0.0653743
0.0622841
0.0530724
0.0626221
0.0762936
0.0712471
0.0731
0.0652137
0.0592466
0.0541328
0.0474061
0.0398694
0.038406
0.0556081
0.0777595
0.0837813
0.0818073
0.0783909
0.0847308
0.0734318
0.0630727
0.0629624
0.0753515
0.0830867
0.0871339
0.0982304
0.116609
0.139775
0.148935
0.141174
0.122398
0.118992
0.124731
0.13998
0.150082
0.150868
0.149482
0.150692
0.159065
0.164729
0.168152
0.160114
0.150936
0.14341
0.149284
0.147007
0.13556
0.135939
0.134966
0.143502
0.151932
0.140836
0.12465
0.10954
0.108667
0.103093
0.105748
0.101847
0.100264
0.10261
0.0909791
0.0820771
0.0799847
0.0694591
0.0587143
0.0405934
0.0199636
0.0136557
0.0126995
0.013758
0.00544173
0.0158437
0.0207354
0.00813463
-0.00672993
-0.0213196
-0.0221308
-0.03747
-0.0466436
-0.0495232
-0.0504946
-0.0488163
-0.045751
-0.0462592
-0.0412143
-0.0436154
-0.0590486
-0.0804678
-0.097234
-0.099382
-0.0951793
-0.097356
-0.116679
-0.113651
-0.101331
-0.0992167
-0.100322
-0.10387
-0.107837
-0.1194
-0.127726
-0.127911
-0.120613
-0.116453
-0.12459
-0.115466
-0.110006
-0.103148
-0.104408
-0.112759
-0.128379
-0.127603
-0.12918
-0.122334
-0.113215
-0.124756
-0.142069
-0.150292
-0.146503
-0.144612
-0.131475
-0.140819
-0.147144
-0.160131
-0.164998
-0.175184
-0.178936
-0.191022
-0.196251
-0.19791
-0.190438
-0.19025
-0.184152
-0.192848
-0.209868
-0.214122
-0.217488
-0.217558
-0.220205
-0.228058
-0.234474
-0.224406
-0.205251
-0.190762
-0.175767
-0.181621
-0.194795
-0.188414
-0.178699
-0.16337
-0.16138
-0.15482
-0.152218
-0.138379
-0.123832
-0.102448
-0.0894336
-0.0889326
-0.0915537
-0.094077
-0.101744
-0.085029
-0.0663907
-0.0643346
-0.0692194
-0.0692291
-0.0600711
-0.0464849
-0.0345734
-0.0437119
-0.0529366
-0.0660315
-0.0736212
-0.0779015
-0.076494
-0.0808126
-0.0799431
-0.0892336
-0.0953573
-0.109088
-0.118167
-0.11182
-0.110882
-0.129466
-0.162972
-0.165995
-0.16826
-0.184918
-0.206488
-0.21536
-0.219579
-0.221032
-0.232293
-0.246454
-0.266854
-0.281916
-0.297361
-0.315823
-0.343152
-0.342911
-0.335186
-0.335061
-0.345882
-0.353464
-0.357969
-0.357889
-0.36526
-0.373283
-0.389655
-0.393224
-0.408194
-0.412031
-0.409659
-0.401059
-0.392556
-0.388853
-0.381639
-0.402569
-0.420552
-0.414715
-0.400433
-0.407594
-0.415032
-0.412344
-0.404455
-0.400289
-0.385958
-0.39453
-0.39408
-0.394197
-0.392981
-0.39403
-0.396297
-0.399124
-0.410959
-0.413701
-0.409071
-0.416834
-0.424659
-0.438776
-0.445551
-0.444078
-0.432575
-0.42231
-0.433934
-0.449706
-0.455892
-0.458938
-0.456938
-0.452916
-0.442756
-0.454797
-0.468556
-0.462024
-0.445079
-0.444735
-0.451533
-0.460093
-0.468172
-0.474541
-0.46622
-0.473618
-0.482226
-0.4797
-0.480981
-0.480413
-0.475609
-0.482624
-0.49514
-0.488881
-0.478333
-0.478309
-0.477951
-0.473104
-0.474321
-0.476018
-0.470589
-0.465063
-0.460674
-0.456238
-0.456898
-0.455483
-0.459066
-0.457121
-0.457287
-0.455076
-0.452439
-0.456996
-0.466316
-0.475395
-0.491264
-0.478325
-0.465036
-0.457975
-0.463786
-0.461187
-0.45442
-0.465257
-0.478783
-0.466843
-0.44788
-0.438526
-0.458389
-0.472878
-0.486901
-0.466258
-0.448487
-0.456901
-0.476243
-0.488864
-0.495735
-0.5001
-0.508993
-0.501088
-0.489315
-0.486074
-0.497582
-0.528206
-0.544015
-0.536231
-0.517714
-0.537443
-0.568717
-0.581882
-0.575349
-0.577299
-0.574908
-0.571395
-0.555591
-0.550813
-0.543398
-0.543363
-0.535312
-0.531978
-0.52626
-0.511276
-0.505506
-0.494668
-0.481887
-0.465452
-0.460334
-0.46365
-0.468686
-0.463308
-0.45631
-0.435909
-0.432162
-0.425623
-0.421747
-0.420668
-0.430654
-0.422693
-0.419285
-0.418414
-0.431729
-0.416631
-0.411312
-0.414737
-0.431384
-0.438476
-0.439111
-0.447559
-0.459014
-0.471216
-0.479652
-0.478674
-0.478579
-0.502466
-0.525721
-0.524428
-0.51242
-0.524435
-0.548624
-0.558377
-0.560327
-0.56035
-0.575608
-0.581901
-0.590122
-0.59346
-0.590415
-0.596352
-0.597871
-0.607329
-0.601833
-0.625454
-0.63792
-0.629406
-0.623892
-0.622661
-0.628907
-0.650422
-0.660518
-0.65782
-0.645452
-0.640424
-0.638168
-0.64165
-0.642386
-0.64667
-0.638278
-0.640531
-0.641591
-0.646658
-0.648146
-0.652511
-0.653187
-0.659751
-0.671304
-0.658493
-0.638833
-0.635156
-0.655266
-0.66689
-0.679988
-0.691659
-0.684431
-0.676928
-0.662707
-0.660645
-0.676591
-0.675376
-0.670146
-0.680513
-0.693499
-0.707477
-0.732655
-0.73691
-0.733014
-0.724784
-0.71803
-0.715279
-0.731449
-0.747038
-0.755144
-0.754405
-0.747067
-0.746658
-0.758053
-0.770466
-0.771129
-0.760361
-0.741777
-0.737193
-0.737793
-0.739339
-0.753385
-0.753471
-0.748785
-0.748534
-0.759711
-0.771432
-0.78274
-0.768835
-0.738965
-0.736219
-0.748499
-0.748826
-0.745089
-0.745174
-0.75012
-0.761234
-0.766798
-0.770702
-0.775687
-0.789498
-0.793753
-0.795647
-0.790476
-0.789399
-0.795297
-0.804621
-0.81355
-0.814447
-0.8143
-0.815837
-0.818341
-0.819935
-0.81303
-0.810246
-0.808691
-0.826421
-0.843792
-0.843947
-0.846373
-0.8395
-0.83708
-0.831217
-0.827567
-0.817707
-0.810211
-0.814755
-0.814584
-0.81763
-0.819828
-0.820337
-0.825631
-0.833073
-0.837995
-0.824656
-0.814098
-0.824672
-0.842842
-0.845627
-0.837871
-0.822252
-0.812247
-0.80421
-0.816203
-0.794418
-0.788778
-0.785012
-0.798417
-0.807609
-0.810928
-0.816676
-0.828605
-0.822081
-0.809441
-0.810879
-0.826827
-0.827096
-0.824396
-0.814391
-0.814393
-0.823819
-0.833928
-0.837592
-0.836264
-0.842366
-0.851229
-0.850495
-0.847883
-0.850173
-0.848808
-0.853269
-0.868466
-0.863015
-0.85643
-0.872168
-0.881559
-0.88477
-0.887741
-0.900202
-0.903649
-0.912847
-0.91393
-0.911033
-0.90157
-0.91978
-0.935091
-0.94049
-0.925776
-0.933735
-0.936767
-0.948033
-0.954686
-0.955756
-0.951828
-0.954467
-0.941681
-0.940982
-0.945913
-0.962064
-0.960081
-0.963846
-0.962846
-0.954444
-0.949282
-0.954321
-0.958878
-0.953035
-0.94881
-0.960891
-0.961453
-0.969704
-0.983895
-0.982968
-0.981934
-0.985565
-0.985281
-0.970552
-0.957059
-0.972617
-0.994786
-1.0025
-0.987839
-0.994929
-1.01354
-1.0198
-1.01768
-1.01168
-1.00573
-1.00628
-1.0003
-0.99423
-0.996724
-1.00887
-1.0218
-1.03053
-1.02237
-1.00807
-0.996622
-0.998944
-0.997706
-0.997195
-0.996036
-0.999864
-1.00302
-0.994324
-0.989028
-0.997019
-1.00186
-1.01199
-1.02095
-1.01737
-1.01196
-1.00529
-0.998317
-1.00166
-1.01212
-1.01859
-1.02091
-1.03033
-1.03856
-1.0458
-1.04522
-1.0504
-1.05114
-1.0602
-1.05986
-1.07232
-1.0775
-1.08656
-1.09269
-1.09191
-1.08703
-1.09143
-1.09539
-1.09435
-1.08907
-1.0999
-1.11898
-1.11898
-1.11232
-1.10021
-1.09063
-1.09498
-1.10844
-1.10819
-1.10211
-1.10536
-1.10494
-1.10622
-1.11439
-1.11493
-1.10752
-1.08643
-1.0678
-1.06001
-1.06806
-1.06986
-1.05795
-1.0559
-1.06156
-1.05818
-1.04642
-1.03907
-1.03796
-1.03732
-1.03362
-1.03756
-1.03137
-1.01785
-1.00596
-1.01767
-1.03079
-1.02986
-1.0299
-1.03153
-1.03755
-1.03604
-1.03464
-1.05505
-1.08211
-1.08149
-1.06023
-1.06041
-1.07242
-1.07899
-1.08967
-1.08656
-1.08019
-1.08223
-1.08513
-1.08533
-1.08476
-1.10367
-1.12295
-1.13072
-1.13387
-1.12967
-1.13001
-1.13211
-1.14372
-1.14453
-1.13648
-1.13545
-1.13657
-1.14813
-1.16651
-1.17473
-1.17728
-1.17675
-1.17516
-1.17226
-1.17081
-1.17696
-1.17774
-1.17636
-1.1695
-1.16439
-1.16981
-1.18919
-1.21184
-1.2059
-1.18791
-1.19448
-1.20774
-1.20277
-1.18035
-1.17563
-1.17296
-1.18033
-1.19373
-1.19676
-1.19682
-1.19251
-1.18885
-1.1969
-1.20297
-1.20552
-1.20802
-1.20537
-1.20499
-1.20429
-1.21601
-1.20749
-1.21015
-1.21925
-1.24168
-1.2392
-1.23041
-1.23221
-1.24192
-1.25913
-1.27241
-1.2779
-1.28269
-1.28572
-1.29143
-1.29055
-1.29074
-1.29451
-1.29991
-1.29849
-1.28811
-1.27437
-1.27468
-1.29798
-1.32255
-1.33214
-1.32748
-1.32379
-1.32019
-1.32332
-1.31483
-1.30417
-1.29214
-1.29263
-1.28217
-1.2849
-1.30259
-1.311
-1.31371
-1.30027
-1.28214
-1.26996
-1.2757
-1.28065
-1.27517
-1.25589
-1.2434
-1.2536
-1.27555
-1.27628
-1.26453
-1.25275
-1.26397
-1.26772
-1.26012
-1.2628
-1.27692
-1.27356
-1.2591
-1.26423
-1.27309
-1.27325
-1.26807
-1.2632
-1.24058
-1.22935
-1.22468
-1.2326
-1.23893
-1.24167
-1.23609
-1.22049
-1.208
-1.21251
-1.21781
-1.22391
-1.22553
-1.22219
-1.21549
-1.2305
-1.25123
-1.26485
-1.27253
-1.26857
-1.24791
-1.24808
-1.25605
-1.25771
-1.26086
-1.27683
-1.29028
-1.30016
-1.31354
-1.31752
-1.32038
-1.32213
-1.3169
-1.31062
-1.31213
-1.31357
-1.32696
-1.34099
-1.35895
-1.35702
-1.36146
-1.35323
-1.3553
-1.36204
-1.3689
-1.36078
-1.35309
-1.35582
-1.36421
-1.36531
-1.36239
-1.36503
-1.36874
-1.36714
-1.3511
-1.32597
-1.30943
-1.31618
-1.32439
-1.32434
-1.32273
-1.32166
-1.33068
-1.34206
-1.33452
-1.33483
-1.3436
-1.33808
-1.32046
-1.30801
-1.2988
-1.31853
-1.35652
-1.37128
-1.35731
-1.34444
-1.33231
-1.33593
-1.33507
-1.3394
-1.34643
-1.345
-1.35027
-1.35509
-1.35412
-1.36797
-1.3869
-1.39472
-1.38672
-1.38129
-1.36992
-1.36186
-1.36334
-1.37242
-1.38701
-1.39477
-1.38961
-1.39208
-1.41117
-1.42375
-1.43097
-1.43525
-1.4261
-1.41638
-1.40335
-1.39945
-1.39701
-1.40388
-1.4162
-1.42202
-1.41464
-1.40869
-1.41277
-1.41465
-1.41763
-1.41217
-1.3934
-1.3928
-1.40832
-1.40674
-1.39672
-1.3972
-1.40722
-1.4108
-1.41654
-1.41231
-1.39214
-1.3819
-1.38262
-1.37936
-1.3729
-1.36272
-1.35646
-1.35608
-1.36276
-1.37142
-1.37398
-1.3677
-1.35829
-1.35076
-1.33924
-1.32751
-1.34159
-1.35179
-1.36089
-1.37224
-1.37529
-1.367
-1.36541
-1.36448
-1.36702
-1.36769
-1.3732
-1.37339
-1.38228
-1.3877
-1.38847
-1.37231
-1.3684
-1.37046
-1.38269
-1.37671
-1.38579
-1.3867
-1.38478
-1.39763
-1.40206
-1.38687
-1.37399
-1.37345
-1.37434
-1.38111
-1.39949
-1.40192
-1.4126
-1.4146
-1.41745
-1.42096
-1.42732
-1.42131
-1.41955
-1.41239
-1.41548
-1.41231
-1.41963
-1.43924
-1.44768
-1.4402
-1.41328
-1.38633
-1.37273
-1.38522
-1.39552
-1.39407
-1.38612
-1.38385
-1.38101
-1.37673
-1.37223
-1.35657
-1.33959
-1.32406
-1.30548
-1.3063
-1.32002
-1.32414
-1.32181
-1.33176
-1.3455
-1.36236
-1.36839
-1.3498
-1.30988
-1.29892
-1.28938
-1.3009
-1.29891
-1.31414
-1.32709
-1.3301
-1.33391
-1.34605
-1.35472
-1.35639
-1.34131
-1.32315
-1.30978
-1.33144
-1.35032
-1.36837
-1.38025
-1.38277
-1.39173
-1.40433
-1.40305
-1.39788
-1.38461
-1.37986
-1.37831
-1.38371
-1.38945
-1.39176
-1.41222
-1.41079
-1.41887
-1.42456
-1.43771
-1.43432
-1.4301
-1.41912
-1.41653
-1.41296
-1.42017
-1.43083
-1.4504
-1.4652
-1.48479
-1.4919
-1.48303
-1.4726
-1.45579
-1.44441
-1.44807
-1.44384
-1.44623
-1.44675
-1.45674
-1.46756
-1.48323
-1.49405
-1.4987
-1.48821
-1.48103
-1.47821
-1.49497
-1.51327
-1.52728
-1.52681
-1.52056
-1.51621
-1.52236
-1.51347
-1.5007
-1.49806
-1.49779
-1.50888
-1.52076
-1.52132
-1.52319
-1.50649
-1.50181
-1.4833
-1.47858
-1.47632
-1.48264
-1.4864
-1.4789
-1.48908
-1.49935
-1.4826
-1.4628
-1.44183
-1.43459
-1.43491
-1.45274
-1.45361
-1.43469
-1.44444
-1.43895
-1.43798
-1.43371
-1.42481
-1.42105
-1.42456
-1.44027
-1.44324
-1.44149
-1.44735
-1.43489
-1.42298
-1.39969
-1.39511
-1.3918
-1.3881
-1.39472
-1.3851
-1.38082
-1.36862
-1.35668
-1.36065
-1.3663
-1.36793
-1.35805
-1.34669
-1.33985
-1.33254
-1.33772
-1.34003
-1.34466
-1.33398
-1.31085
-1.28837
-1.28476
-1.29894
-1.31403
-1.3143
-1.30481
-1.29767
-1.31167
-1.32696
-1.32574
-1.30807
-1.29324
-1.28598
-1.28926
-1.29768
-1.31189
-1.31378
-1.31679
-1.33207
-1.3405
-1.33845
-1.34337
-1.3307
-1.30816
-1.29438
-1.2902
-1.2952
-1.30974
-1.33102
-1.33135
-1.32083
-1.32079
-1.3253
-1.32676
-1.31439
-1.29236
-1.26952
-1.27009
-1.28559
-1.30244
-1.31465
-1.33217
-1.32193
-1.30589
-1.319
-1.34567
-1.3384
-1.33373
-1.32634
-1.31925
-1.32131
-1.34465
-1.36267
-1.37375
-1.37336
-1.355
-1.33173
-1.33078
-1.34261
-1.36609
-1.36459
-1.354
-1.34018
-1.3411
-1.3519
-1.34678
-1.343
-1.33648
-1.31944
-1.30236
-1.30503
-1.31861
-1.32259
-1.32756
-1.32969
-1.31585
-1.29218
-1.28041
-1.28175
-1.28902
-1.29883
-1.30011
-1.28617
-1.29059
-1.27718
-1.25558
-1.24889
-1.25181
-1.24485
-1.23135
-1.22995
-1.22567
-1.22744
-1.22878
-1.22309
-1.21768
-1.20215
-1.19383
-1.18436
-1.19923
-1.22603
-1.24262
-1.25268
-1.25239
-1.24066
-1.22861
-1.23695
-1.26041
-1.25672
-1.25407
-1.28285
-1.31545
-1.3439
-1.34702
-1.35862
-1.36402
-1.37506
-1.38622
-1.38464
-1.40559
-1.42379
-1.45304
-1.46416
-1.46475
-1.46316
-1.45704
-1.45606
-1.44122
-1.42104
-1.41772
-1.42184
-1.43332
-1.44386
-1.44382
-1.43393
-1.41673
-1.40845
-1.37757
-1.36295
-1.35513
-1.3505
-1.35372
-1.35275
-1.34447
-1.32982
-1.32269
-1.29947
-1.26867
-1.25206
-1.24616
-1.23286
-1.21679
-1.22183
-1.21856
-1.21843
-1.22323
-1.2267
-1.22394
-1.22349
-1.22068
-1.21198
-1.20668
-1.20852
-1.18961
-1.17991
-1.17712
-1.16411
-1.1586
-1.16288
-1.17704
-1.18285
-1.18515
-1.19162
-1.18043
-1.16887
-1.14436
-1.1372
-1.13323
-1.14973
-1.17332
-1.17517
-1.17082
-1.17214
-1.1686
-1.17005
-1.15827
-1.15206
-1.14642
-1.14078
-1.1424
-1.13208
-1.13283
-1.13444
-1.14309
-1.14432
-1.13326
-1.12122
-1.09847
-1.08855
-1.08312
-1.06936
-1.06332
-1.05876
-1.06408
-1.0653
-1.06467
-1.05655
-1.04054
-1.03045
-1.01734
-0.994738
-0.974071
-0.969202
-0.977881
-0.966228
-0.947173
-0.953303
-0.965704
-0.977134
-0.970293
-0.974759
-0.969765
-0.964242
-0.945994
-0.942797
-0.947074
-0.952663
-0.954249
-0.949226
-0.945432
-0.948854
-0.943609
-0.957736
-0.958354
-0.962587
-0.95748
-0.956332
-0.958202
-0.952843
-0.950831
-0.960861
-0.960382
-0.951219
-0.933264
-0.915398
-0.909852
-0.91631
-0.926986
-0.932589
-0.937159
-0.92437
-0.907032
-0.905261
-0.89665
-0.878143
-0.847098
-0.823277
-0.801668
-0.803985
-0.823431
-0.814233
-0.80287
-0.794934
-0.789362
-0.769669
-0.743498
-0.73013
-0.717858
-0.703863
-0.690073
-0.686239
-0.680218
-0.68783
-0.697009
-0.687801
-0.686569
-0.690471
-0.690784
-0.682444
-0.679289
-0.662849
-0.660451
-0.667825
-0.67881
-0.673884
-0.67254
-0.677069
-0.690784
-0.689226
-0.693746
-0.692472
-0.683848
-0.690428
-0.706028
-0.7124
-0.725223
-0.733128
-0.728387
-0.731616
-0.749392
-0.744608
-0.739188
-0.748561
-0.755051
-0.774966
-0.787387
-0.781725
-0.765988
-0.761516
-0.767217
-0.768402
-0.757912
-0.753903
-0.754165
-0.758229
-0.754887
-0.751897
-0.733217
-0.723014
-0.704949
-0.684004
-0.667809
-0.677322
-0.688065
-0.694267
-0.688823
-0.676971
-0.67211
-0.666085
-0.668262
-0.643511
-0.617765
-0.621703
-0.630768
-0.631038
-0.626065
-0.618854
-0.612842
-0.615884
-0.618081
-0.609374
-0.601908
-0.601809
-0.59612
-0.589752
-0.579244
-0.585707
-0.602291
-0.600488
-0.595576
-0.60645
-0.625169
-0.638817
-0.638963
-0.633698
-0.618439
-0.619786
-0.608762
-0.620835
-0.628874
-0.628089
-0.612864
-0.600303
-0.583063
-0.58377
-0.586836
-0.584578
-0.574567
-0.565338
-0.549582
-0.535643
-0.518359
-0.518262
-0.51906
-0.519835
-0.51105
-0.497126
-0.485898
-0.484193
-0.489622
-0.498154
-0.495574
-0.495234
-0.487346
-0.473929
-0.462738
-0.457007
-0.447618
-0.443758
-0.44622
-0.442317
-0.443417
[truncated: 400 more rows]
