# Supplementary material for: Modeling FOG Drift Using Back-Propagation Neural Network Optimized by Artificial Fish Swarm Algorithm
Source: Hindawi journal article supplement (doi:10.1155/2014/273043), 2014-01-01
Supplement: f1 [file 273043.f1.zip › mat.273043.v1/datasets/temperature.xls]

## Sheet: Sheet1
-3.4
-3.5
-3.4
-3.5
-3.4
-3.4
-3.4
-3.4
-3.4
-3.5
-3.4
-3.5
-3.4
-3.5
-3.5
-3.5
-3.5
-3.4
-3.4
-3.4
-3.4
-3.4
-3.5
-3.5
-3.4
-3.4
-3.5
-3.5
-3.5
-3.4
-3.5
-3.5
-3.5
-3.5
-3.6
-3.5
-3.5
-3.5
-3.5
-3.5
-3.7
-3.6
-3.6
-3.6
-3.5
-3.6
-3.6
-3.7
-3.6
-3.6
-3.6
-3.6
-3.7
-3.7
-3.7
-3.7
-3.6
-3.7
-3.7
-3.7
-3.7
-3.8
-3.8
-3.7
-3.8
-3.7
-3.7
-3.8
-3.8
-3.8
-3.8
-3.7
-3.8
-3.8
-3.8
-3.8
-3.8
-3.8
-3.8
-3.8
-3.8
-3.8
-3.7
-3.9
-3.9
-3.9
-3.9
-3.8
-3.8
-3.8
-3.8
-3.9
-3.9
-3.9
-3.9
-3.9
-4
-3.8
-3.9
-3.8
-3.9
-3.9
-3.9
-3.9
-3.9
-4
-4
-3.9
-4
-4
-4
-4
-4
-4
-4
-4
-3.9
-4
-3.9
-4
-4
-4.1
-3.9
-3.9
-4
-4.1
-4
-4
-4
-4
-4
-4
-4.1
-4
-4.1
-4.1
-4
-4
-4
-4.1
-4
-4
-4.1
-4
-4
-4
-4.1
-4
-4
-4
-4
-4
-4.1
-4.1
-4.1
-4
-4.1
-4
-4.1
-4
-4.1
-4.1
-4
-4.1
-4
-4.1
-4
-4.1
-4.1
-4.1
-4.1
-4
-4.1
-4.1
-4
-4.2
-4.1
-4.1
-4.1
-4.1
-4.1
-4.2
-4.1
-4.2
-4.1
-4.1
-4.2
-4.1
-4.1
-4.2
-4.1
-4.2
-4.1
-4.1
-4.2
-4.1
-4.1
-4.2
-4.2
-4.2
-4.1
-4.1
-4.1
-4.1
-4.2
-4.2
-4.2
-4.2
-4.2
-4.1
-4.2
-4.1
-4.1
-4.1
-4.2
-4.2
-4.1
-4.1
-4.1
-4.2
-4.2
-4.2
-4.1
-4.3
-4.1
-4.1
-4.2
-4.2
-4.2
-4.2
-4.2
-4.2
-4.2
-4.2
-4.2
-4.2
-4.2
-4.2
-4.2
-4.2
-4.3
-4.2
-4.1
-4.1
-4.1
-4.2
-4.2
-4.2
-4.2
-4.2
-4.3
-4.2
-4.3
-4.2
-4.3
-4.2
-4.3
-4.3
-4.2
-4.2
-4.2
-4.3
-4.2
-4.3
-4.2
-4.1
-4.3
-4.2
-4.3
-4.3
-4.2
-4.2
-4.2
-4.2
-4.3
-4.2
-4.3
-4.2
-4.3
-4.3
-4.3
-4.3
-4.2
-4.3
-4.3
-4.2
-4.3
-4.3
-4.3
-4.2
-4.4
-4.4
-4.3
-4.3
-4.3
-4.3
-4.4
-4.4
-4.4
-4.4
-4.4
-4.5
-4.4
-4.5
-4.4
-4.5
-4.4
-4.4
-4.5
-4.5
-4.6
-4.5
-4.6
-4.6
-4.6
-4.6
-4.6
-4.6
-4.6
-4.6
-4.6
-4.7
-4.6
-4.7
-4.7
-4.6
-4.7
-4.6
-4.7
-4.7
-4.7
-4.7
-4.8
-4.8
-4.8
-4.8
-4.9
-4.8
-4.9
-4.9
-4.9
-4.9
-4.9
-5
-4.9
-5
-5
-4.9
-4.9
-4.9
-5
-5
-5
-5.1
-5
-5.1
-5
-5.1
-5.2
-5.1
-5.2
-5.1
-5.1
-5.2
-5.2
-5.2
-5.2
-5.2
-5.2
-5.3
-5.2
-5.3
-5.3
-5.3
-5.3
-5.2
-5.2
-5.4
-5.3
-5.4
-5.4
-5.3
-5.3
-5.3
-5.4
-5.4
-5.4
-5.4
-5.4
-5.3
-5.4
-5.4
-5.4
-5.4
-5.4
-5.5
-5.5
-5.4
-5.6
-5.5
-5.4
-5.5
-5.5
-5.5
-5.6
-5.5
-5.6
-5.6
-5.7
-5.6
-5.6
-5.6
-5.6
-5.7
-5.6
-5.6
-5.7
-5.7
-5.6
-5.7
-5.6
-5.6
-5.7
-5.7
-5.7
-5.7
-5.7
-5.7
-5.7
-5.8
-5.7
-5.8
-5.8
-5.7
-5.7
-5.9
-5.7
-5.8
-5.8
-5.8
-5.9
-5.9
-5.9
-5.9
-5.8
-5.9
-6
-5.9
-5.8
-5.9
-5.9
-5.9
-6
-6
-6
-6
-6
-6
-5.9
-6
-6
-6
-6
-5.9
-6.1
-6
-6.1
-6.1
-6
-6
-6
-6
-6
-6.1
-6
-6
-6.1
-6.1
-6
-6
-6.1
-6.1
-6
-6.1
-6
-6
-6.2
-6.1
-6
-6.1
-6.1
-6.1
-6.1
-6.1
-6.1
-6.2
-6.2
-6.2
-6.2
-6
-6.1
-6.1
-6
-6.1
-6.2
-6.1
-6.2
-6.1
-6.2
-6.2
-6.1
-6.1
-6.1
-6.1
-6.2
-6.2
-6.2
-6.2
-6.3
-6.1
-6.1
-6.2
-6.1
-6.2
-6.2
-6.1
-6.2
-6.1
-6.2
-6.2
-6.2
-6.1
-6.2
-6.2
-6.1
-6.2
-6.2
-6.2
-6.1
-6.1
-6.2
-6.1
-6.2
-6.2
-6.3
-6.2
-6.2
-6.2
-6.1
-6.3
-6.1
-6.3
-6.3
-6.2
-6.2
-6.2
-6.2
-6.2
-6.2
-6.2
-6.2
-6.2
-6.2
-6.3
-6.3
-6.2
-6.3
-6.3
-6.3
-6.2
-6.3
-6.3
-6.3
-6.3
-6.2
-6.3
-6.3
-6.4
-6.3
-6.3
-6.3
-6.3
-6.3
-6.3
-6.3
-6.3
-6.4
-6.4
-6.5
-6.4
-6.4
-6.4
-6.4
-6.4
-6.4
-6.5
-6.4
-6.5
-6.5
-6.4
-6.5
-6.5
-6.6
-6.5
-6.6
-6.6
-6.5
-6.6
-6.6
-6.6
-6.5
-6.6
-6.6
-6.5
-6.6
-6.6
-6.6
-6.7
-6.6
-6.6
-6.7
-6.6
-6.6
-6.7
-6.7
-6.7
-6.6
-6.6
-6.6
-6.7
-6.7
-6.6
-6.6
-6.6
-6.7
-6.7
-6.6
-6.6
-6.6
-6.7
-6.7
-6.7
-6.6
-6.7
-6.6
-6.6
-6.6
-6.6
-6.6
-6.6
-6.5
-6.6
-6.5
-6.5
-6.6
-6.5
-6.6
-6.5
-6.5
-6.4
-6.5
-6.5
-6.5
-6.4
-6.5
-6.3
-6.3
-6.4
-6.3
-6.4
-6.3
-6.2
-6.3
-6.2
-6.2
-6.2
-6.1
-6.3
-6.2
-6.3
-6.1
-6.2
-6.2
-6.2
-6
-6.2
-6.2
-6.1
-6
-6.1
-6
-6
-6
-5.9
-5.9
-6
-5.9
-5.8
-5.9
-6
-5.9
-5.9
-5.8
-5.8
-5.8
-5.9
-5.7
-5.8
-5.8
-5.8
-5.8
-5.7
-5.7
-5.6
-5.7
-5.7
-5.6
-5.7
-5.7
-5.6
-5.6
-5.5
-5.6
-5.6
-5.5
-5.4
-5.6
-5.5
-5.4
-5.4
-5.4
-5.5
-5.4
-5.3
-5.4
-5.3
-5.3
-5.4
-5.4
-5.3
-5.4
-5.4
-5.2
-5.2
-5.3
-5.3
-5.2
-5.3
-5.2
-5.1
-5.1
-5.2
-5.1
-5.2
-5.1
-5.1
-5.1
-5.2
-5.2
-5.1
-5.1
-5.1
-5
-5
-5.1
-4.9
-5
-5
-5
-5
-5
-5
-5
-4.9
-5
-4.9
-4.8
-4.9
-4.7
-4.8
-4.8
-4.8
-4.9
-4.7
-4.7
-4.7
-4.8
-4.7
-4.8
-4.7
-4.7
-4.7
-4.7
-4.6
-4.6
-4.6
-4.6
-4.6
-4.6
-4.6
-4.5
-4.5
-4.4
-4.4
-4.5
-4.4
-4.4
-4.4
-4.3
-4.4
-4.3
-4.3
-4.3
-4.2
-4.3
-4.3
-4.3
-4.3
-4.3
-4.3
-4.3
-4.3
-4.2
-4.1
-4.1
-4.1
-4.2
-4.1
-4
-4.1
-4
-4.1
-4
-4.1
-4
-4
-4
-4
-4
-3.9
-3.9
-3.9
-3.9
-3.9
-3.9
-3.9
-3.8
-3.8
-3.9
-3.9
-3.8
-3.8
-3.7
-3.8
-3.7
-3.8
-3.7
-3.6
-3.6
-3.6
-3.7
-3.6
-3.6
-3.5
-3.6
-3.5
-3.5
-3.5
-3.4
-3.5
-3.5
-3.4
-3.5
-3.4
-3.3
-3.3
-3.3
-3.4
-3.4
-3.4
-3.3
-3.3
-3.2
-3.3
-3.2
-3.2
-3.2
-3.2
-3.3
-3.2
-3.1
-3.1
-3.2
-3.2
-3.1
-3.1
-3.1
-3
-3
-3.1
-3
-3.1
-3
-3
-3
-2.9
-2.9
-2.9
-3
-3
-2.9
-2.9
-2.9
-2.8
-2.8
-2.9
-2.7
-2.7
-2.8
-2.8
-2.7
-2.7
-2.7
-2.6
-2.7
-2.6
-2.6
-2.6
-2.7
-2.5
-2.6
-2.6
-2.5
-2.5
-2.5
-2.5
-2.6
-2.5
-2.5
-2.5
-2.4
-2.4
-2.3
-2.5
-2.4
-2.4
-2.4
-2.3
-2.3
-2.4
-2.2
-2.2
-2.2
-2.2
-2.2
-2.3
-2.3
-2.2
-2.1
-2.2
-2.2
-2.2
-2.1
-2.1
-2.2
-1.9
-1.8
-2.1
-1.8
-1.7
-1.6
-1.7
-1.7
-1.6
-1.6
-1.6
-1.6
-1.6
-1.6
-1.6
-1.6
-1.4
-1.6
-1.6
-1.5
-1.5
-1.5
-1.4
-1.3
-1.4
-1.4
-1.3
-1.3
-1.4
-1.4
-1.3
-1.4
-1.4
-1.3
-1.2
-1.2
-1.2
-1.3
-1.2
-1.1
-1.1
-1.1
-1.1
-1.1
-1.1
-1
-1.1
-1.1
-1.1
-1.1
-1.1
-1.1
-0.9
-0.9
-1
-0.9
-1
-0.9
-1
-0.9
-1
-0.9
-1
-0.8
-0.8
-0.8
-0.7
-0.8
-0.8
-0.8
-0.7
-0.7
-0.7
-0.7
-0.7
-0.7
-0.7
-0.6
-0.7
-0.7
-0.6
-0.7
-0.6
-0.5
-0.6
-0.5
-0.5
-0.5
-0.4
-0.6
-0.4
-0.4
-0.4
-0.4
-0.4
-0.4
-0.4
-0.4
-0.3
-0.3
-0.3
-0.2
-0.3
-0.2
-0.2
-0.3
-0.2
-0.3
-0.2
-0.2
-0.2
-0.1
-0.2
-0.1
-0.1
-0.1
-0.1
-0.2
0
-0.1
0
0
0
0
0
0
0
0
0.1
0
0.1
0
0.2
0.1
0.1
0.2
0.1
0.1
0.2
0.2
0.2
0.3
0.3
0.2
0.4
0.2
0.3
0.2
0.4
0.3
0.3
0.5
0.4
0.4
0.4
0.3
0.5
0.5
0.4
0.4
0.4
0.5
0.5
0.6
0.6
0.5
0.6
0.6
0.7
0.6
0.6
0.7
0.8
0.7
0.7
0.8
0.8
0.9
0.7
0.7
0.8
0.8
0.8
0.9
0.8
0.9
1
1
0.9
0.9
0.9
0.9
1
1.1
1.1
1
1.1
1.1
1.2
1.2
1.1
1.1
1.2
1.2
1.2
1.1
1.2
1.2
1.2
1.3
1.3
1.3
1.3
1.4
1.4
1.3
1.4
1.5
1.3
1.5
1.5
1.5
1.5
1.4
1.4
1.5
1.4
1.6
1.5
1.6
1.6
1.6
1.6
1.6
1.6
1.6
1.6
1.5
1.6
1.7
1.6
1.7
1.8
1.8
1.7
1.7
1.7
1.7
1.7
1.7
1.8
1.8
1.8
1.9
1.8
1.9
1.9
1.9
1.9
2
2.1
2
2
2
2.1
2
2.1
2.1
2.1
2.2
2.1
2.3
2.2
2.3
2.2
2.2
2.4
2.3
2.3
2.3
2.4
2.4
2.4
2.3
2.4
2.3
2.4
2.4
2.4
2.5
2.4
2.5
2.5
2.4
2.4
2.6
2.5
2.5
2.7
2.7
2.7
2.5
2.6
2.6
2.7
2.7
2.7
2.6
2.8
2.7
2.9
2.8
2.7
3
2.8
2.9
2.9
2.9
2.9
2.9
3
2.9
3
3
3
3
3
3
3.1
3.1
3.2
3
3.1
3.1
3.2
3.1
3.1
3.1
3.2
3.3
3.3
3.2
3.2
3.3
3.3
3.3
3.3
3.4
3.3
3.3
3.4
3.4
3.3
3.5
3.4
3.3
3.4
3.4
3.5
3.5
3.6
3.6
3.6
3.7
3.7
3.6
3.7
3.6
3.6
3.6
3.6
3.7
3.7
3.6
3.7
3.8
3.7
3.7
3.9
3.8
3.8
3.8
3.9
3.9
4
3.9
4
3.9
3.9
4
4
4.1
4
4.2
4.2
4.1
4.2
4.2
4.2
4.1
4.2
4.2
4.2
4.2
4.2
4.3
4.3
4.3
4.3
4.4
4.4
4.3
4.4
4.4
4.4
4.5
4.4
4.5
4.4
4.4
4.5
4.6
4.6
4.5
4.6
4.6
4.6
4.7
4.6
4.5
4.6
4.8
4.8
4.8
4.7
4.8
4.7
4.8
4.8
4.9
4.8
4.9
4.8
4.8
5.1
5
4.9
5.1
5.1
5.2
5.1
5.1
5.3
5.3
5.4
5.4
5.3
5.3
5.4
5.3
5.4
5.4
5.4
5.4
5.5
5.5
5.4
5.4
5.4
5.5
5.5
5.5
5.6
5.5
5.5
5.6
5.6
5.6
5.7
5.6
5.7
5.8
5.8
5.7
5.7
5.8
5.7
5.8
5.7
5.8
5.9
5.8
5.8
5.8
5.9
5.9
5.8
5.9
5.9
5.9
5.9
5.9
5.9
6.1
6
6
6
6
6.1
6.1
6.1
6
6
6.1
6.1
6.1
6.1
6.1
6.1
6.1
6.2
6.2
6.2
6.1
6.2
6.2
6.2
6.3
6.3
6.3
6.3
6.2
6.3
6.3
6.4
6.3
6.3
6.4
6.3
6.4
6.3
6.4
6.4
6.4
6.5
6.4
6.4
6.5
6.5
6.5
6.5
6.5
6.5
6.5
6.5
6.5
6.6
6.7
6.6
6.6
6.7
6.6
6.7
6.7
6.6
6.7
6.8
6.7
6.8
6.8
6.8
6.9
6.8
6.7
6.8
6.8
6.9
6.8
6.9
6.8
6.9
6.9
7
6.9
6.9
7
6.9
7
6.9
7
7
7
7
7.1
7
7
7.1
7.1
7.1
7.1
7.1
7.2
7.1
7.1
7.2
7.2
7.3
7.2
7.2
7.2
7.2
7.2
7.3
7.2
7.3
7.3
7.2
7.3
7.4
7.3
7.3
7.4
7.3
7.4
7.3
7.4
7.4
7.4
7.3
7.3
7.3
7.5
7.4
7.4
7.5
7.6
7.4
7.4
7.4
7.5
7.6
7.5
7.5
7.6
7.7
7.6
7.7
7.6
7.7
7.6
7.6
7.6
7.7
7.8
7.6
7.6
7.7
7.8
7.7
7.8
7.9
7.8
7.8
7.8
7.8
7.7
7.8
7.8
7.8
7.8
7.8
7.8
7.9
7.8
7.9
7.9
7.9
7.9
7.9
7.9
8
8
8
7.9
7.9
8
7.9
8
8
8
8
8
8
8
8.1
8.1
8.1
8.2
8.2
8.1
8.2
8.2
8.2
8.2
8.2
8.1
8.2
8.3
8.2
8.3
8.3
8.3
8.3
8.2
8.4
8.3
8.3
8.5
8.4
8.3
8.3
8.3
8.3
8.3
8.3
8.5
8.4
8.5
8.4
8.4
8.4
8.5
8.6
8.5
8.6
8.5
8.6
8.6
8.6
8.6
8.6
8.6
8.6
8.7
8.6
8.7
8.7
8.6
8.8
8.7
8.8
8.7
8.8
8.7
8.8
8.7
8.9
8.8
8.8
8.8
8.8
8.9
8.9
8.8
8.9
8.8
8.8
9
9
8.9
9
8.9
9
9
9
8.9
9
8.9
9.1
9
9
9
9
9
9.1
9.1
9
9.1
9.1
9
9.1
9.1
9.2
9.2
9.2
9.2
9.2
9.2
9.3
9.2
9.2
9.3
9.3
9.2
9.2
9.2
9.3
9.3
9.3
9.3
9.3
9.3
9.4
9.4
9.4
9.3
9.3
9.3
9.4
9.4
9.3
9.4
9.4
9.3
9.4
9.3
9.4
9.4
9.4
9.4
9.2
9.3
9.4
9.3
9.3
9.4
9.3
9.4
9.3
9.4
9.4
9.3
9.4
9.3
9.3
9.4
9.3
9.3
9.3
9.3
9.3
9.2
9.2
9.3
9.3
9.2
9.3
9.2
9.3
9.2
9.2
9.3
9.2
9.3
9.2
9.2
9.2
9.2
9.3
9.2
9.3
9.2
9.2
9.3
9.2
9.2
9.2
9.2
9.2
9.2
9.2
9.1
9.2
9.1
9.1
9.2
9.1
9.1
9.1
9.1
9.1
9.1
9.2
9.1
9.1
9.1
9
9.1
9.1
9.1
9
9.1
9.1
9.1
9.1
9.1
9
9
9
9
9
9
8.9
9
9
9.1
9
9
9
8.9
9
8.9
9
8.9
8.9
8.9
8.9
8.9
8.9
8.8
8.9
8.8
8.9
8.8
8.9
8.8
8.8
8.9
8.9
8.8
8.7
8.8
8.8
8.9
8.8
8.7
8.8
8.7
8.8
8.7
8.8
8.7
8.7
8.7
8.7
8.7
8.7
8.7
8.7
8.7
8.7
8.7
8.6
8.6
8.6
8.7
8.7
8.6
8.6
8.6
8.6
8.6
8.6
8.5
8.6
8.5
8.5
8.5
8.5
8.5
8.4
8.5
8.5
8.4
8.4
8.4
8.4
8.4
8.4
8.3
8.4
8.3
8.3
8.3
8.4
8.3
8.3
8.3
8.3
8.3
8.3
8.3
8.2
8.3
8.3
8.3
8.3
8.3
8.1
8.2
8.2
8.2
8.2
8.2
8.2
8.1
8.2
8.2
8.1
8.1
8
8.1
8
8.1
8
8.1
8
8.1
8.1
8
8
8
8
7.9
8
[truncated: 400 more rows]
